# Supplementary material for: The Synthesis of Bio-Based Michael Donors from Tall Oil Fatty Acids for Polymer Development
Source: MDPI journal article supplement (doi:10.3390/polym14194107), 2022-09-30
Supplement: s1 [file s1]

**Table S1.** Possible structures that could correspond to the peaks in the MALDI-TOF spectrum (see Figure 4.)

| Synthesized component      | Peaks, m/z | Theoretically probable structures                                                    | Molar mass (X+Na <sup>+</sup> ), g/mol |
|----------------------------|------------|--------------------------------------------------------------------------------------|----------------------------------------|
| E <sup>IR</sup> TOFA_BD    | 425.33     | 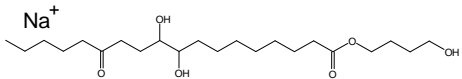   | 425.55                                 |
|                            | 481.31     |    | 481.66                                 |
|                            | 483.41     |    | 483.68                                 |
|                            | 497.39     |    | 497.66                                 |
|                            | 795.65     |  | 796.12                                 |
| E <sup>IR</sup> TOFA_BD_AA | 677.39     |  | 677.77                                 |
|                            | 733.45     |  | 733.88                                 |

| Synthesized component    | Peaks, m/z | Theoretically probable structures                                                    | Molar mass (X+Na+), g/mol |
|--------------------------|------------|--------------------------------------------------------------------------------------|---------------------------|
|                          | 735.47     | 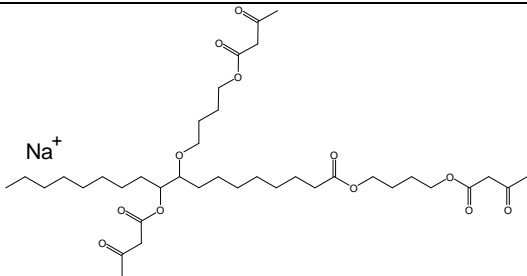   | 735.90                    |
|                          | 749.45     |    | 749.88                    |
|                          | 1131.74    |   | 1132.41                   |
| E <sup>IR</sup> TOFA_TMP | 455.34     |  | 455.62                    |
|                          | 469.33     |  | 469.61                    |
|                          | 569.42     |  | 569.77                    |
|                          | 571.43     |  | 571.78                    |
|                          | 585.41     |  | 585.77                    |

| Synthesized component        | Peaks,<br>m/z | Theoretically probable structures                                                    | Molar mass (X+Na+),<br>g/mol |
|------------------------------|---------------|--------------------------------------------------------------------------------------|------------------------------|
| EIR <sup>+</sup> TOFA_TMP_AA | 719.51        | 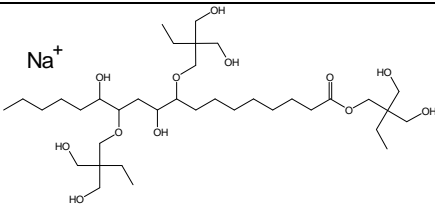   | 719.94                       |
|                              | 409.19        |    | 409.38                       |
|                              | 804.44        |    | 805.90                       |
|                              | 989.56        |   | 990.13                       |
|                              | 991.57        |  | 992.15                       |
|                              | 1005.55       |  | 1006.13                      |

| Synthesized component | Peaks,<br>m/z | Theoretically probable structures                                                   | Molar mass (X+Na+),<br>g/mol |
|-----------------------|---------------|-------------------------------------------------------------------------------------|------------------------------|
|                       | 1391.72       | 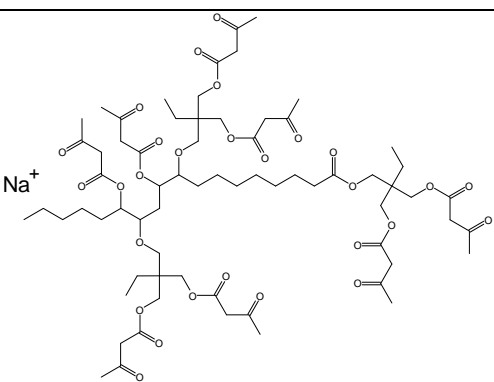  | 1392.53                      |
| L3300                 | 463.31        |   | 463.56                       |
| L3300_AA              | 715.40        |  | 715.78                       |
